# Supplementary material
Source: PubMed Central journal article supplement (PMC6820848)
Supplement: NIHMS1055381-supplement-1.pdf [file NIHMS1055381-supplement-1.pdf]

## *Supporting Information*

For

### **Rational design of [<sup>13</sup>C,<sup>D</sup><sub>14</sub>]*tert*-butylbenzene as a scaffold structure for designing long-lived hyperpolarized <sup>13</sup>C probes**

Yuki Imakura<sup>a</sup>, Hiroshi Nonaka<sup>\*a</sup>, Yoichi Takakusagi<sup>b</sup>,  
Kazuhiro Ichikawa<sup>bc</sup>, Nesmine R. Maptue<sup>d</sup>, Alexander M. Funk<sup>d</sup>,  
Chalermchai Khemtong<sup>dc</sup> and Shinsuke Sando<sup>\*a</sup>

<sup>a</sup>*Department of Chemistry and Biotechnology, Graduate School of Engineering, The University of Tokyo,  
7-3-1 Hongo, Bunkyo-ku, Tokyo 113-8656, Japan.*

<sup>b</sup>*Incubation Center for Advanced Medical Science, Kyushu University, 3-1-1 Maidashi, Higashi-ku,  
Fukuoka 812-8582, Japan.*

<sup>c</sup>*Innovation Center for Medical Redox Navigation, Kyushu University, 3-1-1 Maidashi, Higashi-ku,  
Fukuoka 812-8582, Japan.*

<sup>d</sup>*Advanced Imaging Research Center, University of Texas Southwestern Medical Center, 5323 Harry  
Hines Boulevard, Dallas, Texas 75390, USA.*

<sup>e</sup>*Department of Radiology, University of Texas Southwestern Medical Center, 5323 Harry Hines  
Boulevard, Dallas, Texas 75390, USA.*

#### **CONTENTS:**

- 1. Synthesis**
- 2.  $T_1$  measurement**
- 3. Analysis of  $T_1$  relaxation mechanisms**
- 4. DNP–NMR measurement**
- 5. Reference**

## 1. Synthesis

**General.** Reagents and solvents were purchased from standard suppliers and used without further purification. NMR spectra were measured using a JEOL ECS400 spectrometer. Acetone- $d_6$  in chloroform (2.15 ppm) or acetone- $d_6$  in methanol (2.15 ppm) was used as the internal standard for  $^2\text{H}$  NMR. Chloroform- $d_1$  (77.0 ppm), methanol- $d_4$  (49.0 ppm), or methanol in  $\text{D}_2\text{O}$  (49.5 ppm) was used as the internal standard for  $^{13}\text{C}$  NMR. Mass spectra (MS) were measured using a Bruker micrOTOF II (ESI) and a SHIMADZU GCMS-QP2010 (EI) .

**Scheme S1.** Synthetic scheme of [ $^{13}\text{C},\text{D}_{13}$ ]sodium *tert*-butylbenzenesulfonate (**S1D**).

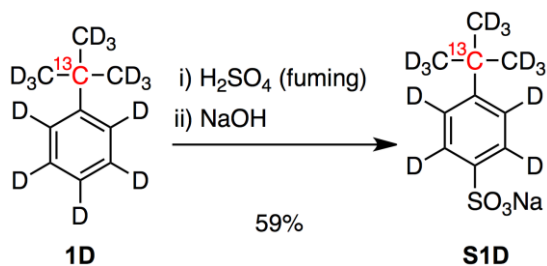

### Characterization of [ $^{13}\text{C}$ ]tert-butylbenzene (1).

$^1\text{H}$  NMR ( $\text{CD}_3\text{OD}$ , 400 MHz)  $\delta$  = 1.21 (9H, d,  $^2J_{\text{CH}} = 3.6$  Hz), 7.02 (1H, dd, 7.4 Hz), 7.16 (2H, dd, 7.6 Hz), 7.27-7.30 (2H, m);  $^{13}\text{C}$  NMR ( $\text{CD}_3\text{OD}$ , 100 MHz)  $\delta$  = 30.8 ( $^1J_{\text{CC}} = 35$  Hz), 35.4, 126.2, 126.4, 129.0, 144.9.

### Synthesis of [ $^{13}\text{C}$ , $\text{D}_5$ ]benzoic acid.

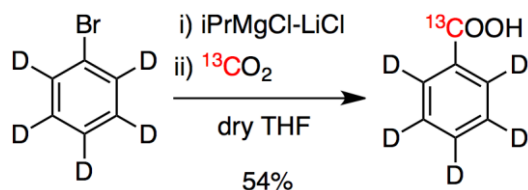

Under a nitrogen atmosphere, [ $\text{D}_5$ ]bromobenzene (1.85 mL, 17.5 mmol) was added dropwise to a solution of 0.96 M  $\text{iPrMgCl}$  in THF (20 mL, 19.2 mmol) at  $-20$  °C. The mixture was stirred at room temperature for 18.5 h. In another flask, concd.  $\text{H}_2\text{SO}_4$  (10 mL) was added dropwise to [ $^{13}\text{C}$ ]BaCO<sub>3</sub> (5.0 g, 25.2 mmol) on ice under a nitrogen atmosphere. The liberated [ $^{13}\text{C}$ ]CO<sub>2</sub> was collected in a rubber balloon and bubbled into a stirred bromobenzene/Grignard mixture at  $-5$  °C under a nitrogen atmosphere. The reaction was then quenched with water. After removing THF solvent, 2N aqueous HCl and  $\text{CHCl}_3$  were added to the crude residue. The mixture was extracted with  $\text{CHCl}_3$  three times. The combined organic phase was dried over sodium sulfate and evaporated *in vacuo* to give [ $^{13}\text{C}$ , $\text{D}_5$ ]benzoic acid as a white solid (1214 mg, 54%) Further purification was not performed in this step:  $^2\text{H}$  NMR ( $\text{CHCl}_3$ , 61 MHz)  $\delta$  = 7.5 ( $3 \times ^2\text{H}$ ), 8.2 ( $2 \times ^2\text{H}$ );  $^{13}\text{C}$  NMR ( $\text{CD}_3\text{OD}$ , 100 MHz)  $\delta$  = 128.9 ( $^1J_{\text{CD}} = 25$  Hz), 130.3 ( $^1J_{\text{CD}} = 25$  Hz), 131.6 (d,  $^1J_{\text{CC}} = 72$  Hz), 133.5 ( $^1J_{\text{CD}} = 24$  Hz), 169.9; HRMS(ESI):  $m/z$  calc. for  $\text{C}_6^{13}\text{CHD}_5\text{O}_2$  [ $\text{M-H}$ ]<sup>-</sup> = 127.0642, found = 127.0637.

### Synthesis of [<sup>13</sup>C,<sup>D</sup><sub>14</sub>]tert-butylbenzene (**1D**).

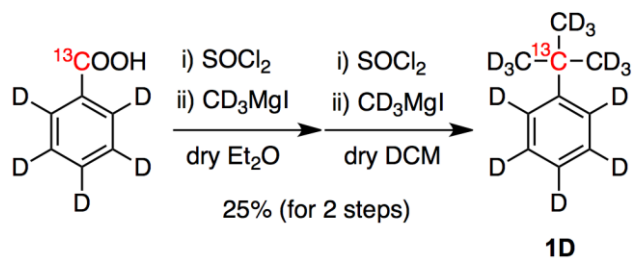

SOCl<sub>2</sub> (5 mL) was added dropwise to [<sup>13</sup>C,<sup>D</sup><sub>5</sub>]benzoic acid (513 mg, 4 mmol) on ice. The mixture was stirred at room temperature for 5 h. After removing SOCl<sub>2</sub> *in vacuo* on ice, the resulting oil was co-evaporated with dry Et<sub>2</sub>O and diluted with dry Et<sub>2</sub>O (12 mL) under a nitrogen atmosphere. The mixture was added dropwise to a solution of 1 M [<sup>D</sup><sub>3</sub>]methyl magnesium iodide in Et<sub>2</sub>O (12 mL, 12 mmol) diluted with dry Et<sub>2</sub>O (12 mL) at -40 °C under a nitrogen atmosphere. The mixture was stirred at room temperature for 16.5 h under a nitrogen atmosphere. Aqueous NH<sub>4</sub>Cl was added dropwise to the mixture for quenching reaction and stirred for 10 min. The mixture was extracted with Et<sub>2</sub>O five times. The combined organic phase was washed with brine and evaporated. After CH<sub>2</sub>Cl<sub>2</sub> was added to the resulting oil, the mixture was dried over sodium sulfate and evaporated to give [<sup>13</sup>C,<sup>D</sup><sub>11</sub>]2-phenyl-2-propanol as a brown oil including impurity (531 mg). Further purification was not performed in this step: <sup>2</sup>H NMR (MeOH, 61 MHz) □ δ = 1.6 (6 × <sup>2</sup>H), 7.3 (1 × <sup>2</sup>H), 7.5 (2 × <sup>2</sup>H), 7.7 (2 × <sup>2</sup>H); <sup>13</sup>C NMR (CD<sub>3</sub>OD, 100 MHz) □ δ = 30.5-31.7 (m), 72.5, 125.0 (<sup>1</sup>J<sub>CD</sub> = 24 Hz), 126.7 (<sup>1</sup>J<sub>CD</sub> = 24 Hz), 128.4 (<sup>1</sup>J<sub>CD</sub> = 24 Hz), 150.3 (d, <sup>1</sup>J<sub>CC</sub> = 48 Hz). MS(EI): m/z calc. for C<sub>8</sub><sup>13</sup>CHD<sub>11</sub>O [M-CD<sub>3</sub>]<sup>+</sup> = 130.1, found = 130.1.

Under a nitrogen atmosphere, 1 M [<sup>D</sup><sub>3</sub>]methyl magnesium iodide in Et<sub>2</sub>O (11.2 mL, 11.2 mmol) was added to a flask. After removing Et<sub>2</sub>O *in vacuo*, a residue was co-evaporated with dry CH<sub>2</sub>Cl<sub>2</sub> while slightly warming to complete the removal of ether. Dry CH<sub>2</sub>Cl<sub>2</sub> (8.4 mL) was added to the resulting residue. In another flask, SOCl<sub>2</sub> (880 μL, 11.2 mmol) was added dropwise to a solution of [<sup>13</sup>C,<sup>D</sup><sub>11</sub>]2-phenyl-2-propanol (531 mg including impurity from the former step) in dry CH<sub>2</sub>Cl<sub>2</sub> (40 mL) on ice. The mixture was stirred on ice for 30 min. After removing SOCl<sub>2</sub> and CH<sub>2</sub>Cl<sub>2</sub> *in vacuo* on ice, the resulting oil was co-evaporated with dry CH<sub>2</sub>Cl<sub>2</sub> and diluted with dry CH<sub>2</sub>Cl<sub>2</sub> (8.4 mL) under a nitrogen atmosphere. The mixture was added dropwise to a Grignard reagent in dry CH<sub>2</sub>Cl<sub>2</sub> under a

nitrogen atmosphere on ice. The mixture was stirred at room temperature for 2 days under a nitrogen atmosphere. Ice was added into the mixture for quenching reaction. The mixture was extracted with CH<sub>2</sub>Cl<sub>2</sub> three times. The combined organic phase was washed with aqueous NH<sub>4</sub>Cl and brine. The organic phase was dried over sodium sulfate and the solvent was evaporated carefully not to loss the volatile product. The resulting oil was purified using preparative layer chromatography (eluent: hexane) to give [<sup>13</sup>C,<sup>D</sup><sub>14</sub>]*tert*-butylbenzene (**1D**) as a clear oil (151 mg, 25% in 2 steps): <sup>2</sup>H NMR (MeOH, 61 MHz) □ δ = 1.3 (9 × <sup>2</sup>H), 7.2 (1 × <sup>2</sup>H), 7.3 (2 × <sup>2</sup>H), 7.5 (2 × <sup>2</sup>H); <sup>13</sup>C NMR (CD<sub>3</sub>OD, 100 MHz) □ δ = 30.1-31.2 (m), 34.7, 125.7 (<sup>1</sup>J<sub>CD</sub> = 23 Hz), 125.8 (<sup>1</sup>J<sub>CD</sub> = 24 Hz), 128.5 (<sup>1</sup>J<sub>CD</sub> = 24 Hz), 151.9 (d, <sup>1</sup>J<sub>CC</sub> = 43 Hz); MS(EI): m/z calc. for C<sub>9</sub><sup>13</sup>CD<sub>14</sub> [M]<sup>+</sup> = 149.2, found = 149.2.

#### Synthesis of [<sup>13</sup>C,<sup>D</sup><sub>13</sub>]sodium *tert*-butylbenzenesulfonate (**S1D**).

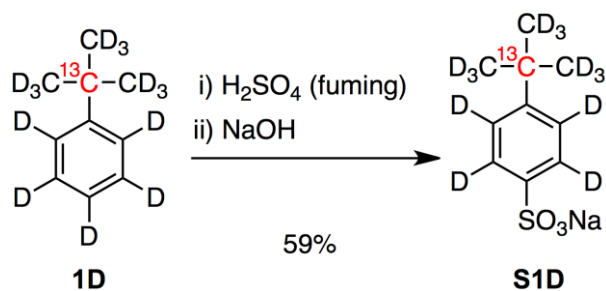

Fuming H<sub>2</sub>SO<sub>4</sub> (96 μL, 2 mmol) was added dropwise to [<sup>13</sup>C,<sup>D</sup><sub>14</sub>]*tert*-butylbenzene (**1D**; 149 mg, 1 mmol). The mixture was shaken at room temperature for 2 h. Water (1 mL) was added to the mixture for quenching reaction. The mixture was neutralized with 1N aqueous NaOH. After removing water *in vacuo*, the resulting white solid was extracted with dry EtOH. In this step, the first extract was discarded because it included *meta*-substituted product, and the combined extracts after second extract were evaporated. Water was added to the resulting residue and then filtered to remove insoluble material. The solution was evaporated *in vacuo* to give [<sup>13</sup>C,<sup>D</sup><sub>13</sub>]sodium *tert*-butylbenzenesulfonate (**S1D**) as a white solid (149 mg, 59%): <sup>2</sup>H NMR (MeOH, 61 MHz) □ δ = 1.3 (9 × <sup>2</sup>H), 7.5 (2 × <sup>2</sup>H), 7.8 (2 × <sup>2</sup>H); <sup>13</sup>C NMR (D<sub>2</sub>O, 100 MHz) □ δ = 29.3-30.4 (m), 34.3, 125.3-126.6 (m), 139.9, 156.0 (d, <sup>1</sup>J<sub>CC</sub> = 43 Hz); HRMS(ESI): m/z calc. for C<sub>9</sub><sup>13</sup>CD<sub>13</sub>NaO<sub>3</sub>S [M-Na]<sup>-</sup> = 227.1440, found = 227.1449.

## 2. $T_1$ measurement

All  $T_1$  measurements were performed under thermal equilibrated conditions. The  $T_1$  measurements were conducted using a JEOL JNM-ECS 400 (9.4 T), a JEOL JNM-ECA 500 (11.7 T), and JEOL JNM-ECA 600 (14.1 T) by inversion recovery method.

## 3. Analysis of $T_1$ relaxation mechanisms

The extent of contribution of each relaxation mechanism is represented as shown in eq 1.

$$\frac{1}{T_1} = \frac{1}{T_1^{CH-DD}} + \frac{1}{T_1^{CSA}} + \frac{1}{T_1^{O2}} + \frac{1}{T_1^{res}} \quad (eq\ 1)$$

### (i) $T_1^{CH-DD}$ calculation by measurements of $T_1$ and NOE $(1+\eta)^{1-6}$

$^{13}\text{C}$ - $^1\text{H}$  DD contribution ( $T_1^{CH-DD}$ ) is calculated according to eq 2 by using nuclear Overhauser enhancement (NOE,  $1+\eta$ ) parameter in  $^{13}\text{C}$  NMR experiment on irradiation at  $^1\text{H}$  frequency .

$$T_1^{CH-DD} = T_1 \frac{1.988}{\eta} \quad (eq\ 2)$$

The NOE ( $1+\eta$ ) was measured on a JEOL JNM-ECS 400 (9.4 T, 25 °C) (Table S1). After measuring the  $^{13}\text{C}$  NMR spectra with or without NOE, the value  $\eta$  was determined using the following equation:

$$1+\eta = (\text{ $^{13}\text{C}$  Integral}_{\text{with NOE}})/(\text{ $^{13}\text{C}$  Integral}_{\text{without NOE}})$$

**Table S1.**  $^{13}\text{C}$  spin-lattice relaxation times ( $T_1$ ) and NOE ( $1+\eta$ ) of **1** and **1D**.<sup>[a]</sup>

|           | $T_1$ [s]    | NOE( $1 + \eta$ ) for $^{13}\text{C}$ | $T_1^{\text{DD}}$ ( $^{13}\text{C}$ - $^1\text{H}$ ) [s] |
|-----------|--------------|---------------------------------------|----------------------------------------------------------|
| <b>1</b>  | $103 \pm 1$  | $2.70 \pm 0.07$                       | $120 \pm 5$                                              |
| <b>1D</b> | $541 \pm 18$ | ca. $1.0^{\text{[b]}}$                | $_{\text{[b]}}$                                          |

[a] **1** and **1D** were dissolved in degassed toluene- $d_8$ .  $T_1$  values were determined by using the inversion recovery method at 25 °C (toluene- $d_8$ , 9.4 T). [b]  $^{13}\text{C}$ - $^1\text{H}$  DD contribution of **1D** was too small to be determined.

**(ii)  $T_1^{\text{CSA}}$  calculation by  $T_1$  measurements at various magnetic fields<sup>7,8</sup>**

Chemical shift anisotropy (CSA) relaxation is dependent on external magnetic field;  $1/T_1^{\text{CSA}}$  is proportional to the square of the magnetic field ( $B_0^2$ ). To investigate CSA contribution ( $T_1^{\text{CSA}}$ ),  $T_1$  values of **1** and **1D** at various magnetic fields were measured according to previously reported methods.<sup>7,8</sup>  $T_1^{\text{CSA}}$  of **1** was estimated to be 1695 s (Table S2; degassed, 9.4 T, 25 °C).  $T_1^{\text{CSA}}$  of **1D** could not be estimated by the field dependent studies, because  $T_1^{\text{SC}}$  derived from  $^2\text{H}$  of **1D** would be also affected by magnetic field strength.

**(iii)  $T_1^{\text{O}_2}$  calculation by  $T_1$  measurements under non-degassed/degassed conditions<sup>1,4</sup>**

Under the assumption that other relaxation mechanisms are not affected by the presence or absence of oxygen,  $T_1^{\text{O}_2}$  of **1** and **1D** was estimated to be 180 and 175 s, respectively using eq 3 (9.4 T, 25 °C) (Table S2).

$$\frac{1}{T_1^{\text{O}_2}} = \frac{1}{T_1(\text{non-degassed})} + \frac{1}{T_1(\text{degassed})} \quad (\text{eq 3})$$

**(iv)  $T_1^{\text{res}}$  calculation<sup>1</sup>**

$T_1^{\text{res}}$  indicates all other residual contributions including SR and SC.  $T_1^{\text{res}}$  was calculated from eq 1.<sup>1</sup>

**Table S2.**  $^{13}\text{C}$  spin-lattice relaxation parameters in non-degassed toluene- $d_8$  at 25 °C, 9.4 T.

|           | $T_1$ | $T_1^{\text{DD}}$ | $T_1^{\text{CSA}}$ | $T_1^{\text{res}}$ | $T_1^{\text{O}_2}$ |
|-----------|-------|-------------------|--------------------|--------------------|--------------------|
| <b>1</b>  | 65    | 120               | 1695               | 1200               | 180                |
| <b>1D</b> | 132   | - <sup>[a]</sup>  |                    | 541 <sup>[b]</sup> | 175                |

[a]  $^{13}\text{C}$ - $^1\text{H}$  DD contribution of **1D** was too small to be determined. [b] Sum of  $T_1^{\text{CSA}}$  and  $T_1^{\text{res}}$ .

#### 4. DNP–NMR measurement

A 8  $\mu$ L solution of Probe **S1D** (0.5 M) and OX063 trityl radical (Oxford Instruments, UK) in 50:50 glycerol-water was polarized at  $\sim$ 1.2 K for 3 h in a HyperSense DNP polarizer (Oxford Instruments, UK). A solution of hyperpolarized **S1D** was obtained by rapidly dissolving the frozen sample with superheated water (4 mL) and subsequently transferred into a 10-mm NMR tube inside a 400 NMR spectrometer (Agilent Technologies, USA).  $^{13}\text{C}$  NMR acquisition was initiated 20 s after the initial dissolution to allow for complete transfer and mixing of the solution. A series of  $^{13}\text{C}$  NMR spectra were acquired with a 5-degree pulse every 5 s at room temperature ( $\sim$ 22  $^{\circ}\text{C}$ ).  $^{13}\text{C}$  signal intensity at each time point was normalized to the signal intensity at the first time point. Signal enhancements were calculated according to the previously described methods.<sup>9</sup>

#### 5. Reference

- S1. G. C. Levy, *Acc. Chem. Res.* 1973, **6**, 161.
- S2. E. Breitmaier, K. H. Spohn, S. Berger, *Angew. Chem. Int. Ed.* 1975, **14**, 144.
- S3. K. F. Kuhlmann, D. M. Grant, *J. Am. Chem. Soc.* 1968, **90**, 7355.
- S4. G. C. Levy, J. D. Cargioli, F. A. L. Anet, *J. Am. Chem. Soc.* 1973, **95**, 1527.
- S5. D. D. Giannini, I. M. Armitage, H. Pearson, D. M. Grant, J. D. Roberts, *J. Am. Chem. Soc.* 1975, **97**, 3416.
- S6. D. Gust, H. Pearson, I. M. Armitage, J. D. Roberts, *J. Am. Chem. Soc.* 1976, **98**, 2723.
- S7. T. D. Alger, W. D. Jr. Hamill, R. J. Pugmire, D. M. Grant, G. D. Silcox, M. Solum, *J. Phys. Chem.* 1980, **84**, 632.
- S8. T. C. Wong, T. T. Ang, F. S. Guziec, C. A. Moustakis, *J. Magn. Reson.* 1984, **57**, 463.
- S9. Jiang et al., *Sci. Rep.* 2015, **5**, 9104.
